# Supplementary material
Source: Springer Nature journal article supplement (https://www.springermedizin.de/resource/supplementary/12985_2010_908_MOESM4_ESM.pdf/9608714)
Supplement: MOESM4 [file 9608714]

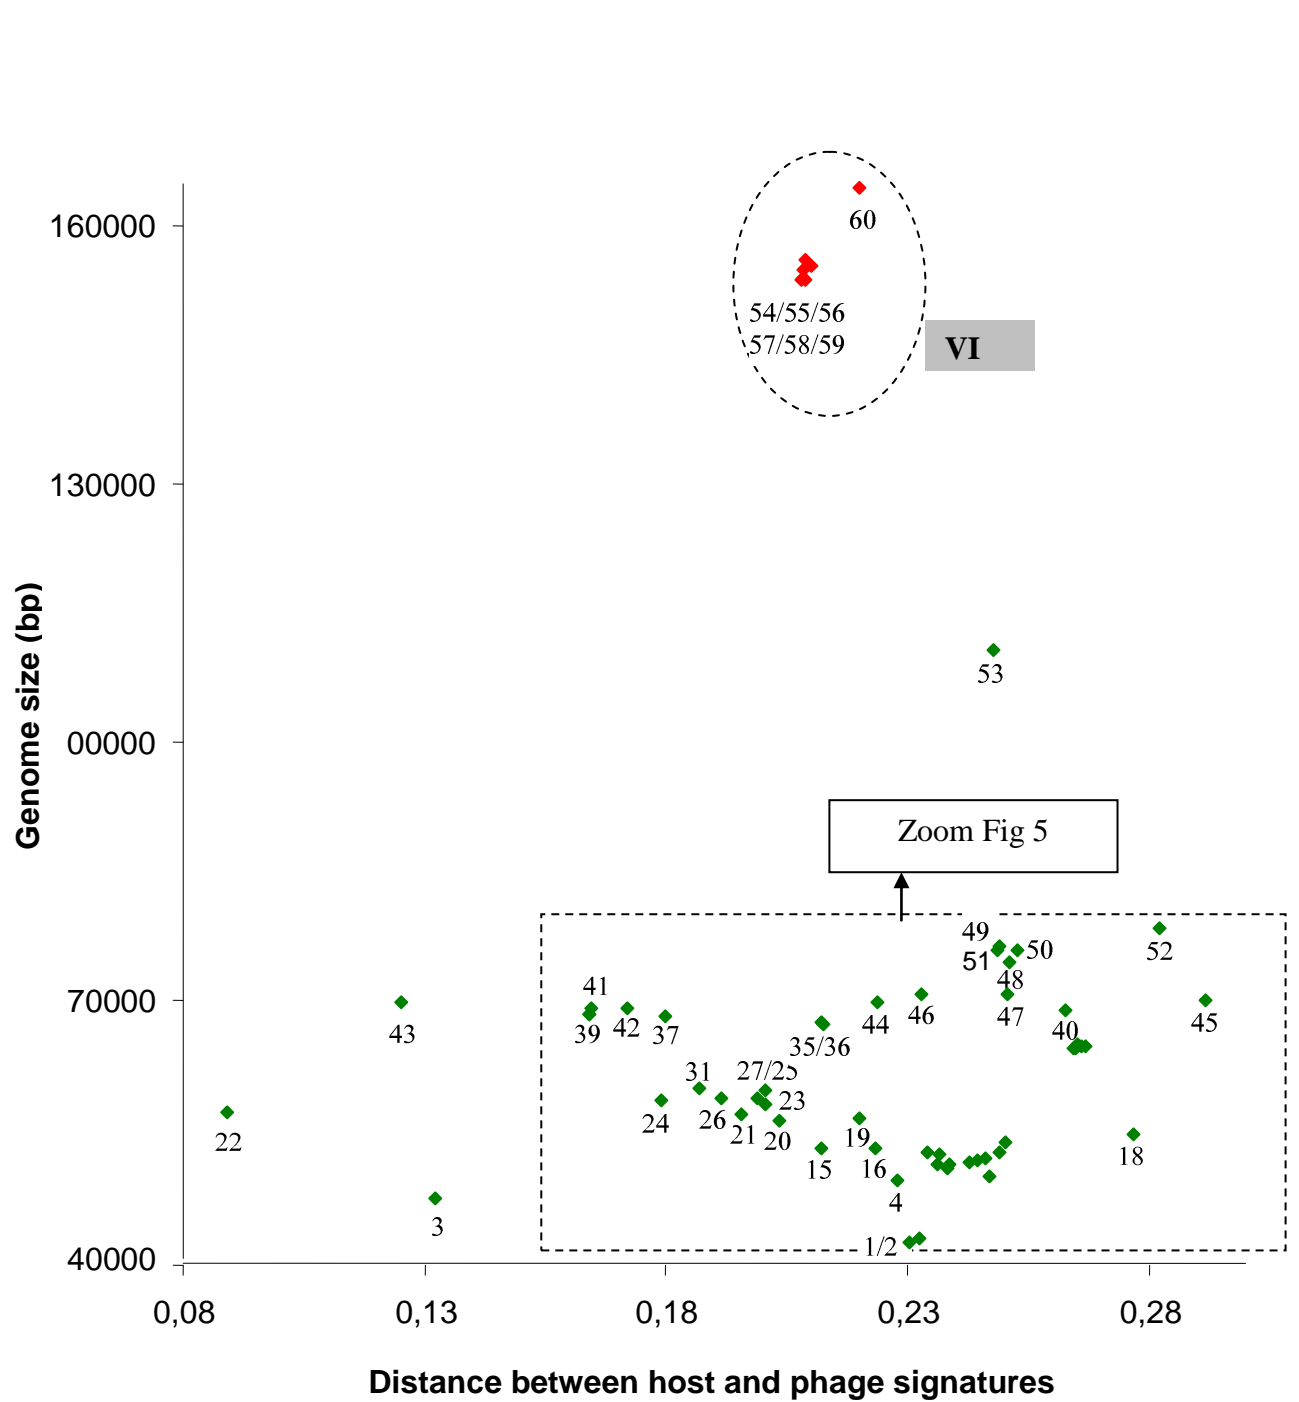

| Number | name         | Genome size | Accession | References    |
|--------|--------------|-------------|-----------|---------------|
| 1      | BPs          | 41901       | NC_010762 | not published |
| 2      | Halo         | 42289       | NC_008202 | [103]         |
| 3      | Brujita      | 47057       | NC_011291 | not published |
| 4      | D29          | 49136       | NC_001900 | [48]          |
| 5      | Solon        | 49487       | NC_011267 | not published |
| 6      | Bxb1         | 50550       | NC_002656 | [58]          |
| 7      | Bxz2         | 50913       | NC_004682 | [57]          |
| 8      | Jasper       | 50968       | NC_011020 | not published |
| 9      | U2           | 51277       | NC_009877 | [103]         |
| 10     | Lockley      | 51478       | NC_011021 | not published |
| 11     | DD5          | 51621       | NC_011022 | not published |
| 12     | Che12        | 52047       | NC_008203 | [103]         |
| 13     | Bethlehem    | 52250       | NC_009878 | [103]         |
| 14     | L5           | 52297       | NC_001335 | [104]         |
| 15     | TM4          | 52797       | NC_003387 | [59]          |
| 16     | Pukovnik     | 52892       | NC_011023 | not published |
| 17     | KBG          | 53572       | NC_011019 | [57]          |
| 18     | Giles        | 54512       | NC_009993 | [60]          |
| 19     | Che9d        | 56276       | NC_004686 | [57]          |
| 20     | PMC          | 56692       | NC_008205 | [103]         |
| 21     | Llij         | 56852       | NC_008196 | [103]         |
| 22     | Che9c        | 57050       | NC_004683 | [57]          |
| 23     | Boomer       | 58037       | NC_011054 | not published |
| 24     | Fruitloop    | 58471       | NC_011288 | not published |
| 25     | Pacc40       | 58554       | NC_011287 | not published |
| 26     | Ramsey       | 58578       | NC_011289 | not published |
| 27     | Che8         | 59471       | NC_004680 | [57]          |
| 28     | PBI1         | 64494       | NC_008198 | [103]         |
| 29     | Adjutor      | 64511       | NC_010763 | not published |
| 30     | Butterscotch | 64562       | NC_011286 | not published |
| 31     | Tweety       | 58695       | NC_011285 | [61]          |
| 32     | Troll4       | 64618       | NC_011285 | not published |
| 33     | PLot         | 64787       | NC_008200 | [103]         |
| 34     | Gumball      | 64807       | NC_011290 | not published |
| 35     | Qyrzula      | 67188       | NC_008204 | [103]         |
| 36     | Rosebush     | 67480       | NC_004684 | [57]          |
| 37     | Phaedrus     | 68090       | NC_011057 | not published |
| 38     | Orion        | 68427       | NC_008197 | [103]         |
| 39     | Chah         | 68450       | NC_011284 | not published |
| 40     | Konstantine  | 68952       | NC_011292 | not published |
| 41     | PG1          | 68999       | NC_005259 | not published |
| 42     | Pipefish     | 69059       | NC_008199 | [103]         |
| 43     | Corn dog     | 69777       | NC_004685 | [57]          |
| 44     | Nigel        | 69904       | NC_011044 | not published |
| 45     | Predator     | 70110       | NC_011039 | not published |
| 46     | Cooper       | 70654       | NC_008195 | [103]         |
| 47     | Barnyard     | 70797       | NC_004689 | [57]          |
| 48     | 244          | 74483       | NC_008194 | [103]         |
| 49     | Kostya       | 75811       | NC_011056 | not published |
| 50     | Cjw1         | 75931       | NC_004681 | [57]          |
| 51     | Porky        | 76312       | NC_011055 | not published |
| 52     | Wildcat      | 78441       | NC_008206 | [103]         |
| 53     | Omega        | 110865      | NC_004688 | [57]          |
| 54     | Catera       | 153766      | NC_008207 | [103]         |
| 55     | Rizal        | 153894      | NC_011272 | not published |
| 56     | ScottMcG     | 154017      | NC_011269 | not published |
| 57     | Spud         | 154906      | NC_011270 | not published |
| 58     | Cali         | 155372      | NC_011271 | not published |
| 59     | Bxz1         | 156102      | NC_004687 | [57]          |
| 60     | Myrna        | 164602      | NC_011273 | not published |
